# Supplementary material
Source: Research Square preprint supplement (doi:10.21203/rs.3.rs-10022690/v1)
Supplement: Supplementary file 1 [file 5d953daaa268e4b604df97cd.docx]

**Electronic Supplementary Material**

*Assessment of Groundwater Storage Variability and Recharge Dynamics in Nigeria's Major Aquifer Systems (2002-2024): An Integrated GRACE/GRACE-FO, GLDAS, and Borehole-Validated Satellite Gravimetry Analysis*

**Samuel Olaide Okediji**

*Department of Applied Geophysics, Federal University of Agriculture Abeokuta, Nigeria*

samuelolaideokediji@gmail.com | ORCID: 0009-0001-3220-971X

# **ESM Table S1**

**Table S1** Chad Basin observation borehole water level decline 1960-2012. Positive values indicate artesian head above ground surface; negative values indicate water level below ground. Source: Miller et al. (1968) and Adamu et al. (2017).

| **Year** | **Dalori (Middle Zone)** | **Sabsawa (Middle Zone)** | **Gajibo (Lower Zone)** |
| --- | --- | --- | --- |
| 1960 | +5.8 m (artesian) | +12.5 m (artesian) | +12.5 m (artesian) |
| 1965 | -18.2 m | +3.9 m (artesian) | +10.2 m (artesian) |
| 2007 | -36.2 m | -4.0 m | +1.2 m (artesian) |
| 2012 | -43.2 m | -6.8 m | +0.3 m |
| Net 1960-2012 | -49.0 m | -19.3 m | -12.2 m |
| Annual rate | -0.94 m yr-1 | -0.37 m yr-1 | -0.23 m yr-1 |

# **ESM Table S2**

**Table S2** Borehole validation summary across the six aquifer zones. Direct validation: monthly time series correlation against satellite anomalies. Indirect validation: formation-specific hydraulic parameters constraining Sy and aquifer geometry assumptions.

| **Zone** | **Sample Boreholes** | **Source Period** | **Depth Range (m)** | **T Range (m2 day-1)** | **Validation Type** |
| --- | --- | --- | --- | --- | --- |
| Chad Basin | 15 USGS + 3 long-term | 1963-2012 | 55-400+ | 5.5-10,800 | Direct (1960-2012 time series) |
| Sokoto Basin | 40 hydrochemical | 2017 | 30-250 | 300-5,000 | Indirect (formation parameters) |
| Basement Complex | 34 VES sites | 2009-2020 | 2.45-37.88 | 0.01-50 | Indirect (geometry, Sy) |
| Niger Delta | 10 coastal boreholes | 2021 | 195-265 | 50-8,000 | Indirect (formation parameters) |
| Middle Niger | 17 VES at Lokoja | 2019 | 15-55 | 38-146,440 | Indirect (geometry, Sy) |
| Benue Trough | 30 VES + 12 LGAs | 2018, 2020, 2022 | 3-65 | 0.19-684 | Indirect (geometry, Sy) |

# **ESM Fig S1**


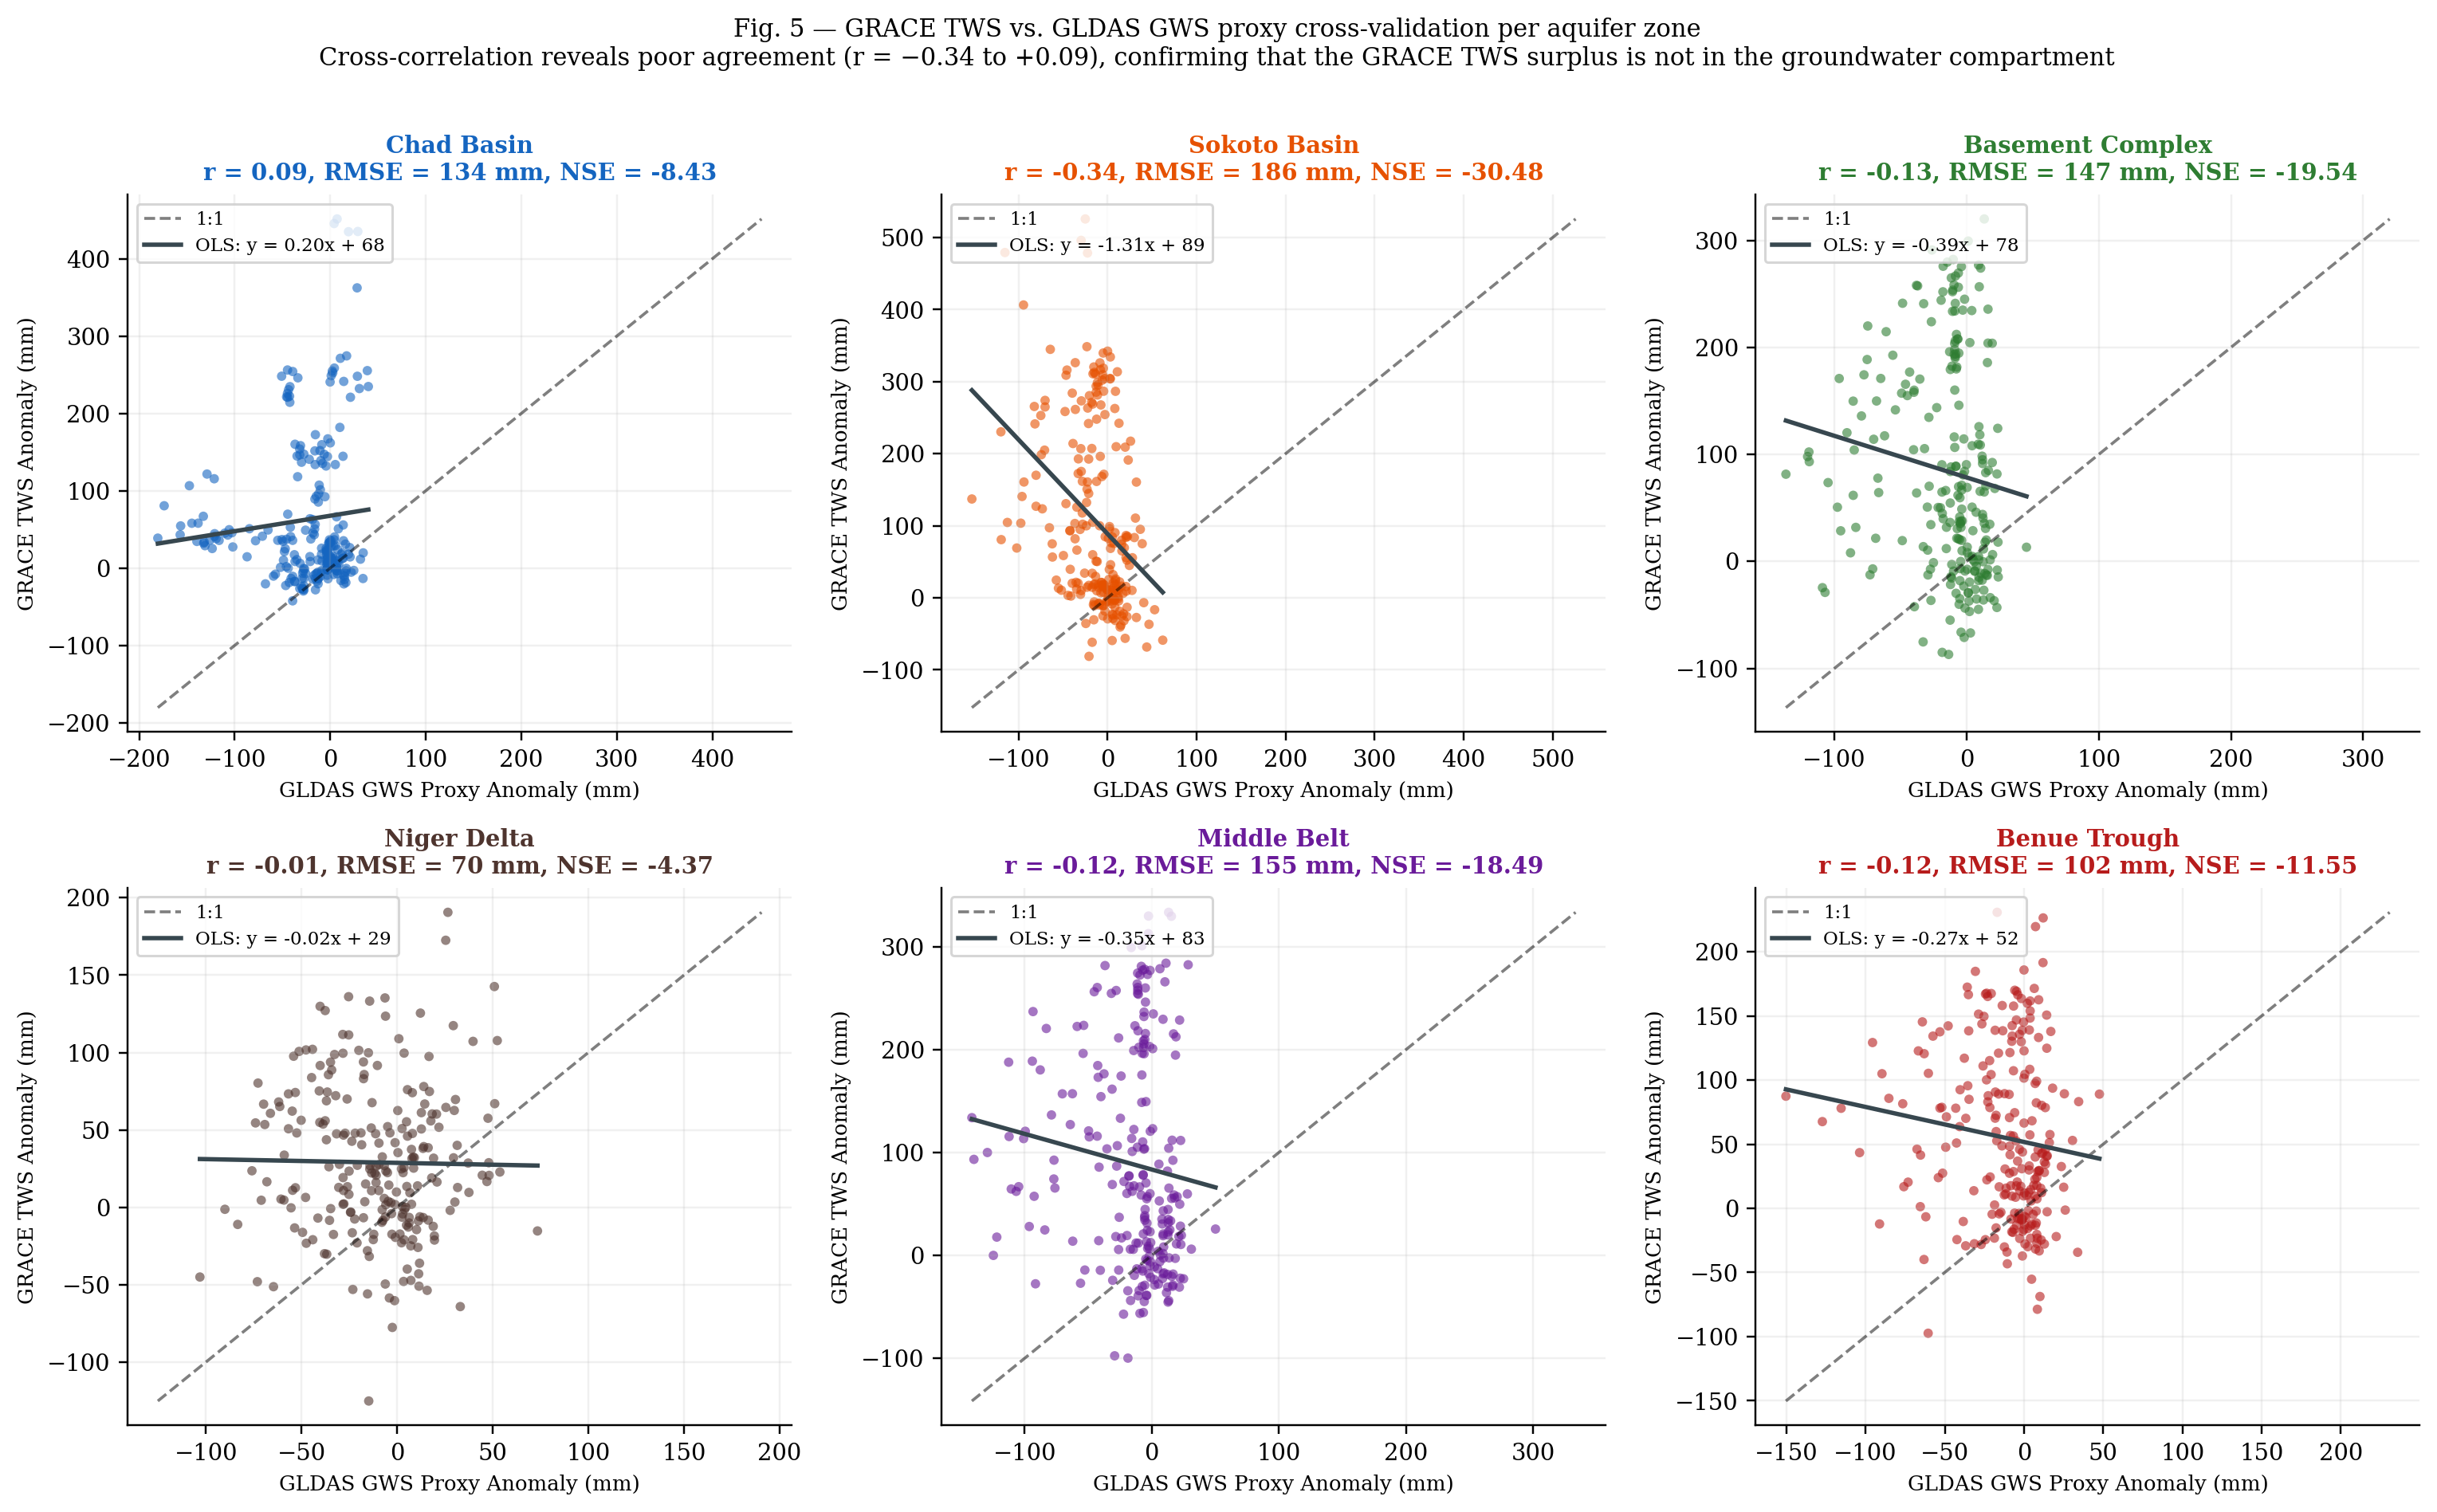


**Fig. S1** Scatter plots of GRACE TWS anomaly versus GLDAS GWS proxy anomaly per aquifer zone (n = 238 overlapping months). Pearson correlations are weak (r = -0.34 to +0.09), with five of six zones showing weak negative correlation. RMSE 70-186 mm; NSE uniformly negative across all zones. Systematic departure from the 1:1 line quantifies the non-groundwater component in the GRACE TWS signal.

# **ESM Fig S2**


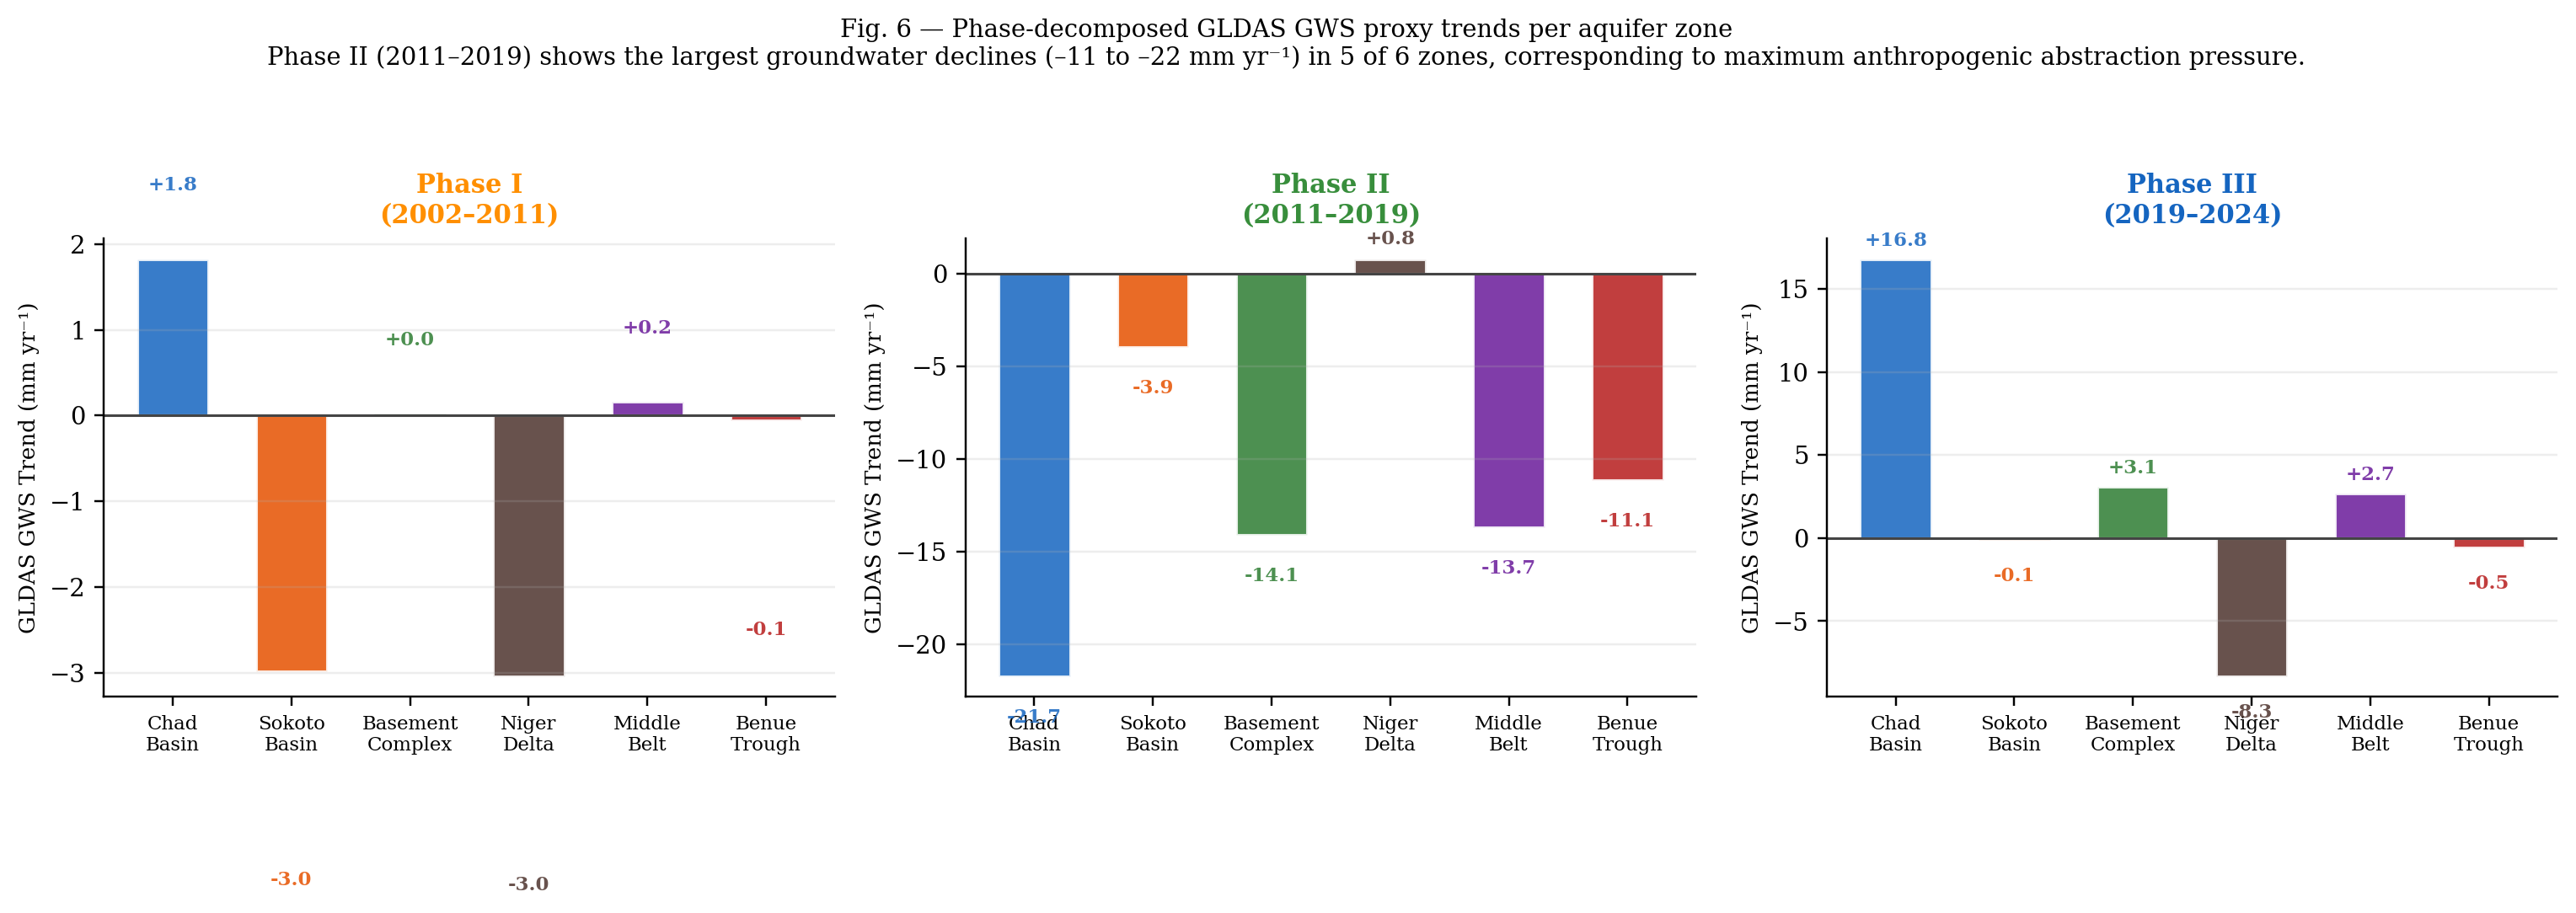


**Fig. S2** Phase-decomposed GLDAS GWS proxy trends per aquifer zone. Phase I (2002-2010): near-zero trends in all zones (range -3.0 to +1.8 mm yr-1). Phase II (2011-2018): steepest declines in five of six zones (-11 to -22 mm yr-1) coinciding with documented motorised irrigation expansion. Phase III (2019-2024): partial recovery in northern zones; continued decline in the Niger Delta driven by urban demand growth.

# **ESM Fig S3**


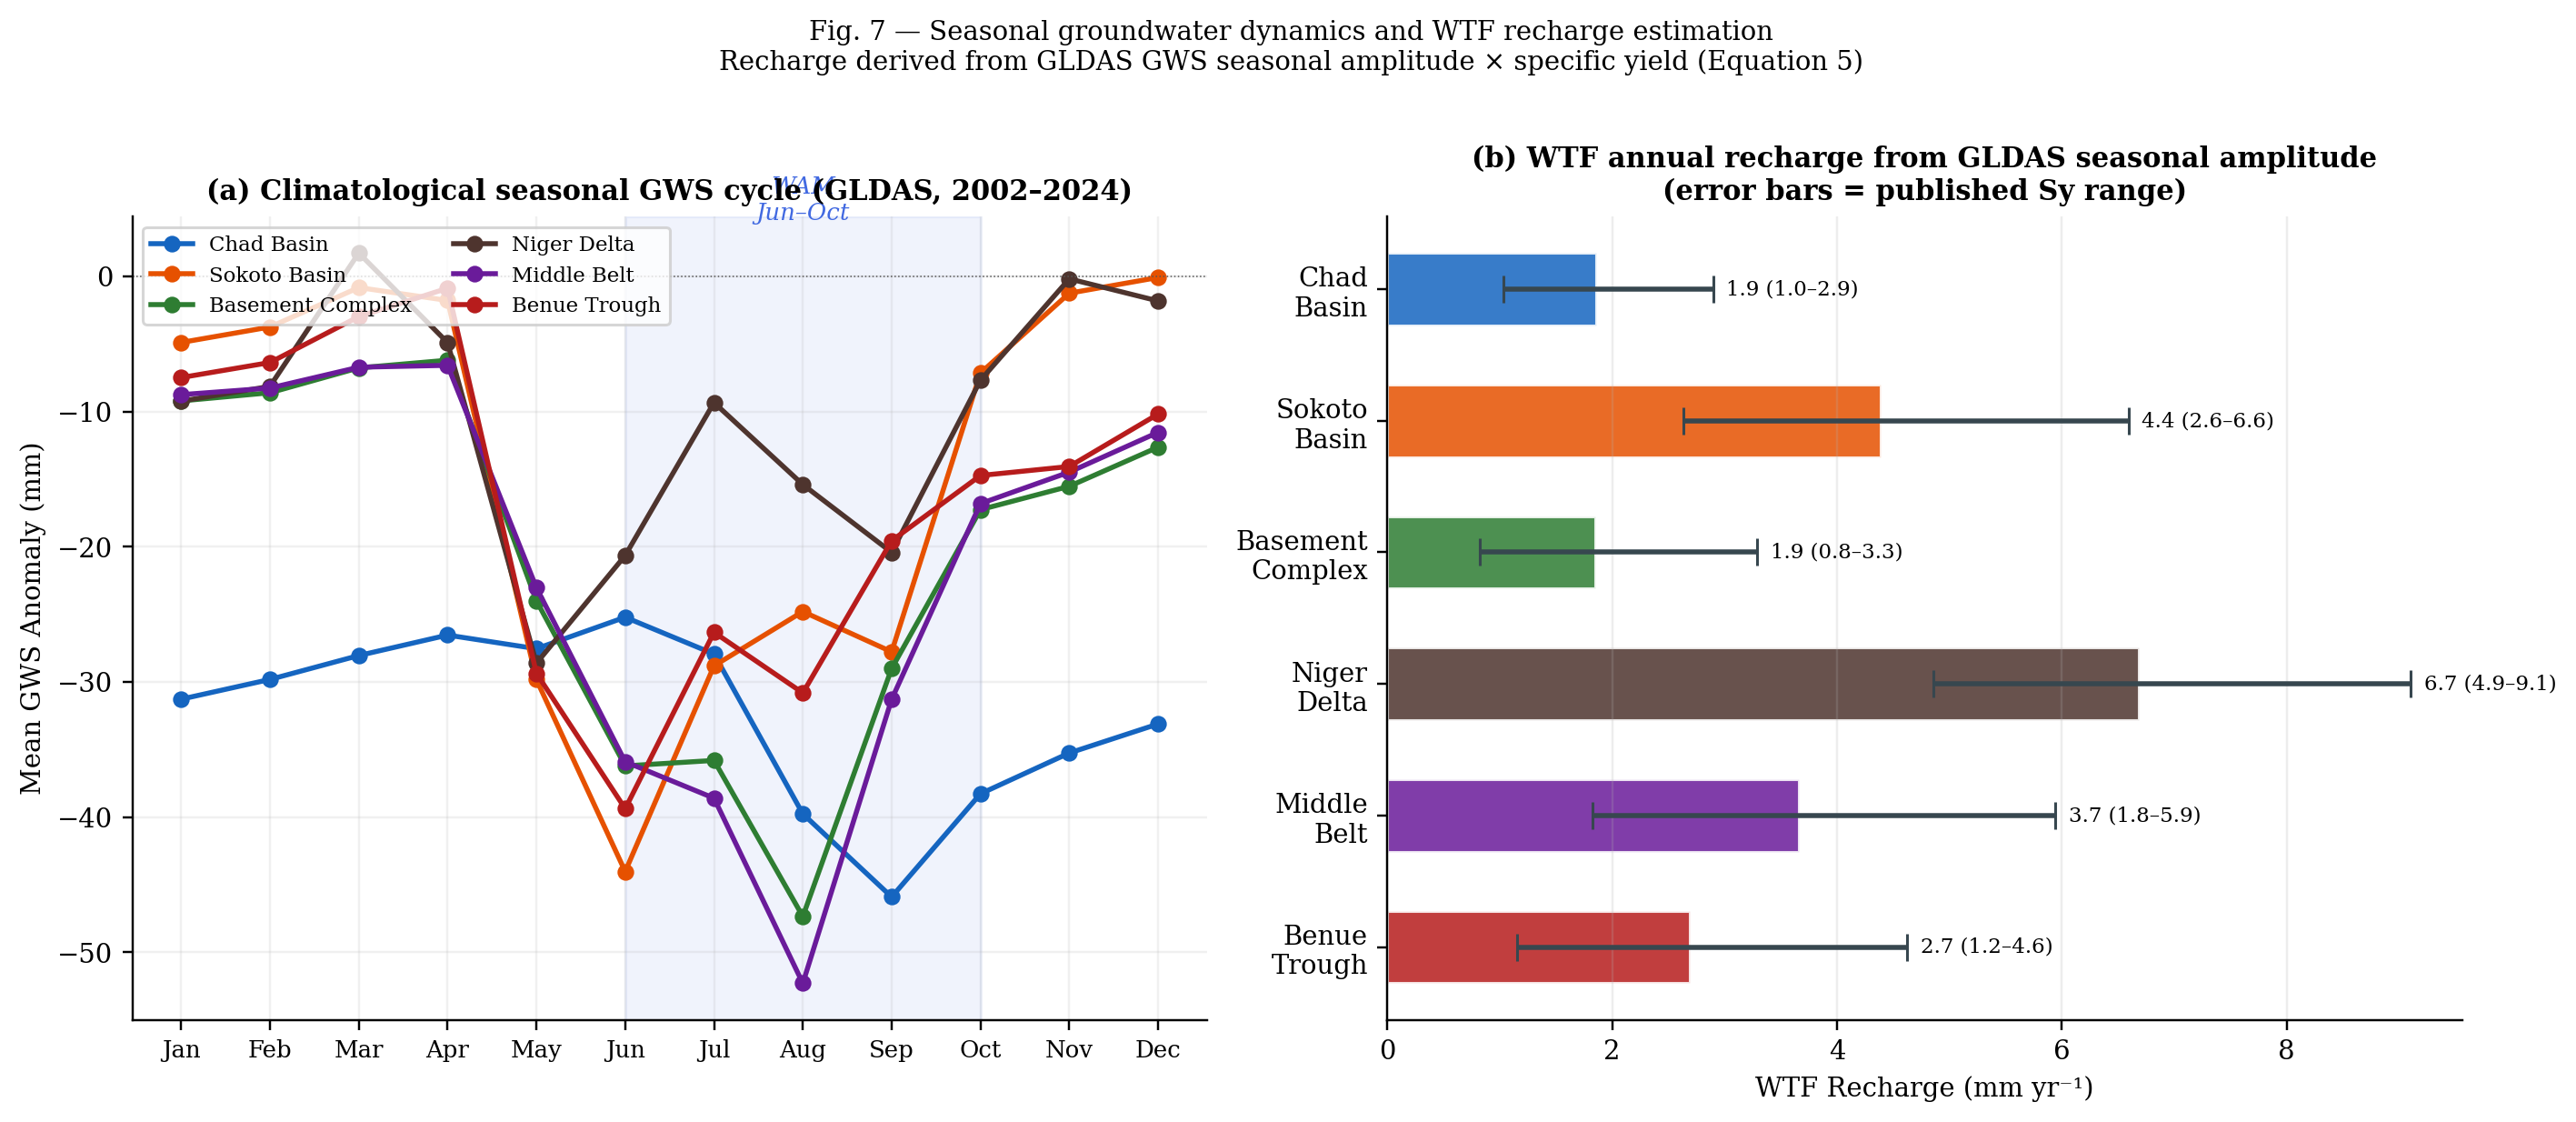


**Fig. S3** Water Table Fluctuation (WTF) recharge estimation. (a) Climatological monthly GLDAS GWS seasonal cycle per zone (2002-2024 mean); West African Monsoon recharge season (June-October) shaded. (b) WTF annual recharge estimates per zone with sensitivity bars spanning published specific yield ranges per formation type.

# **ESM Fig S4**


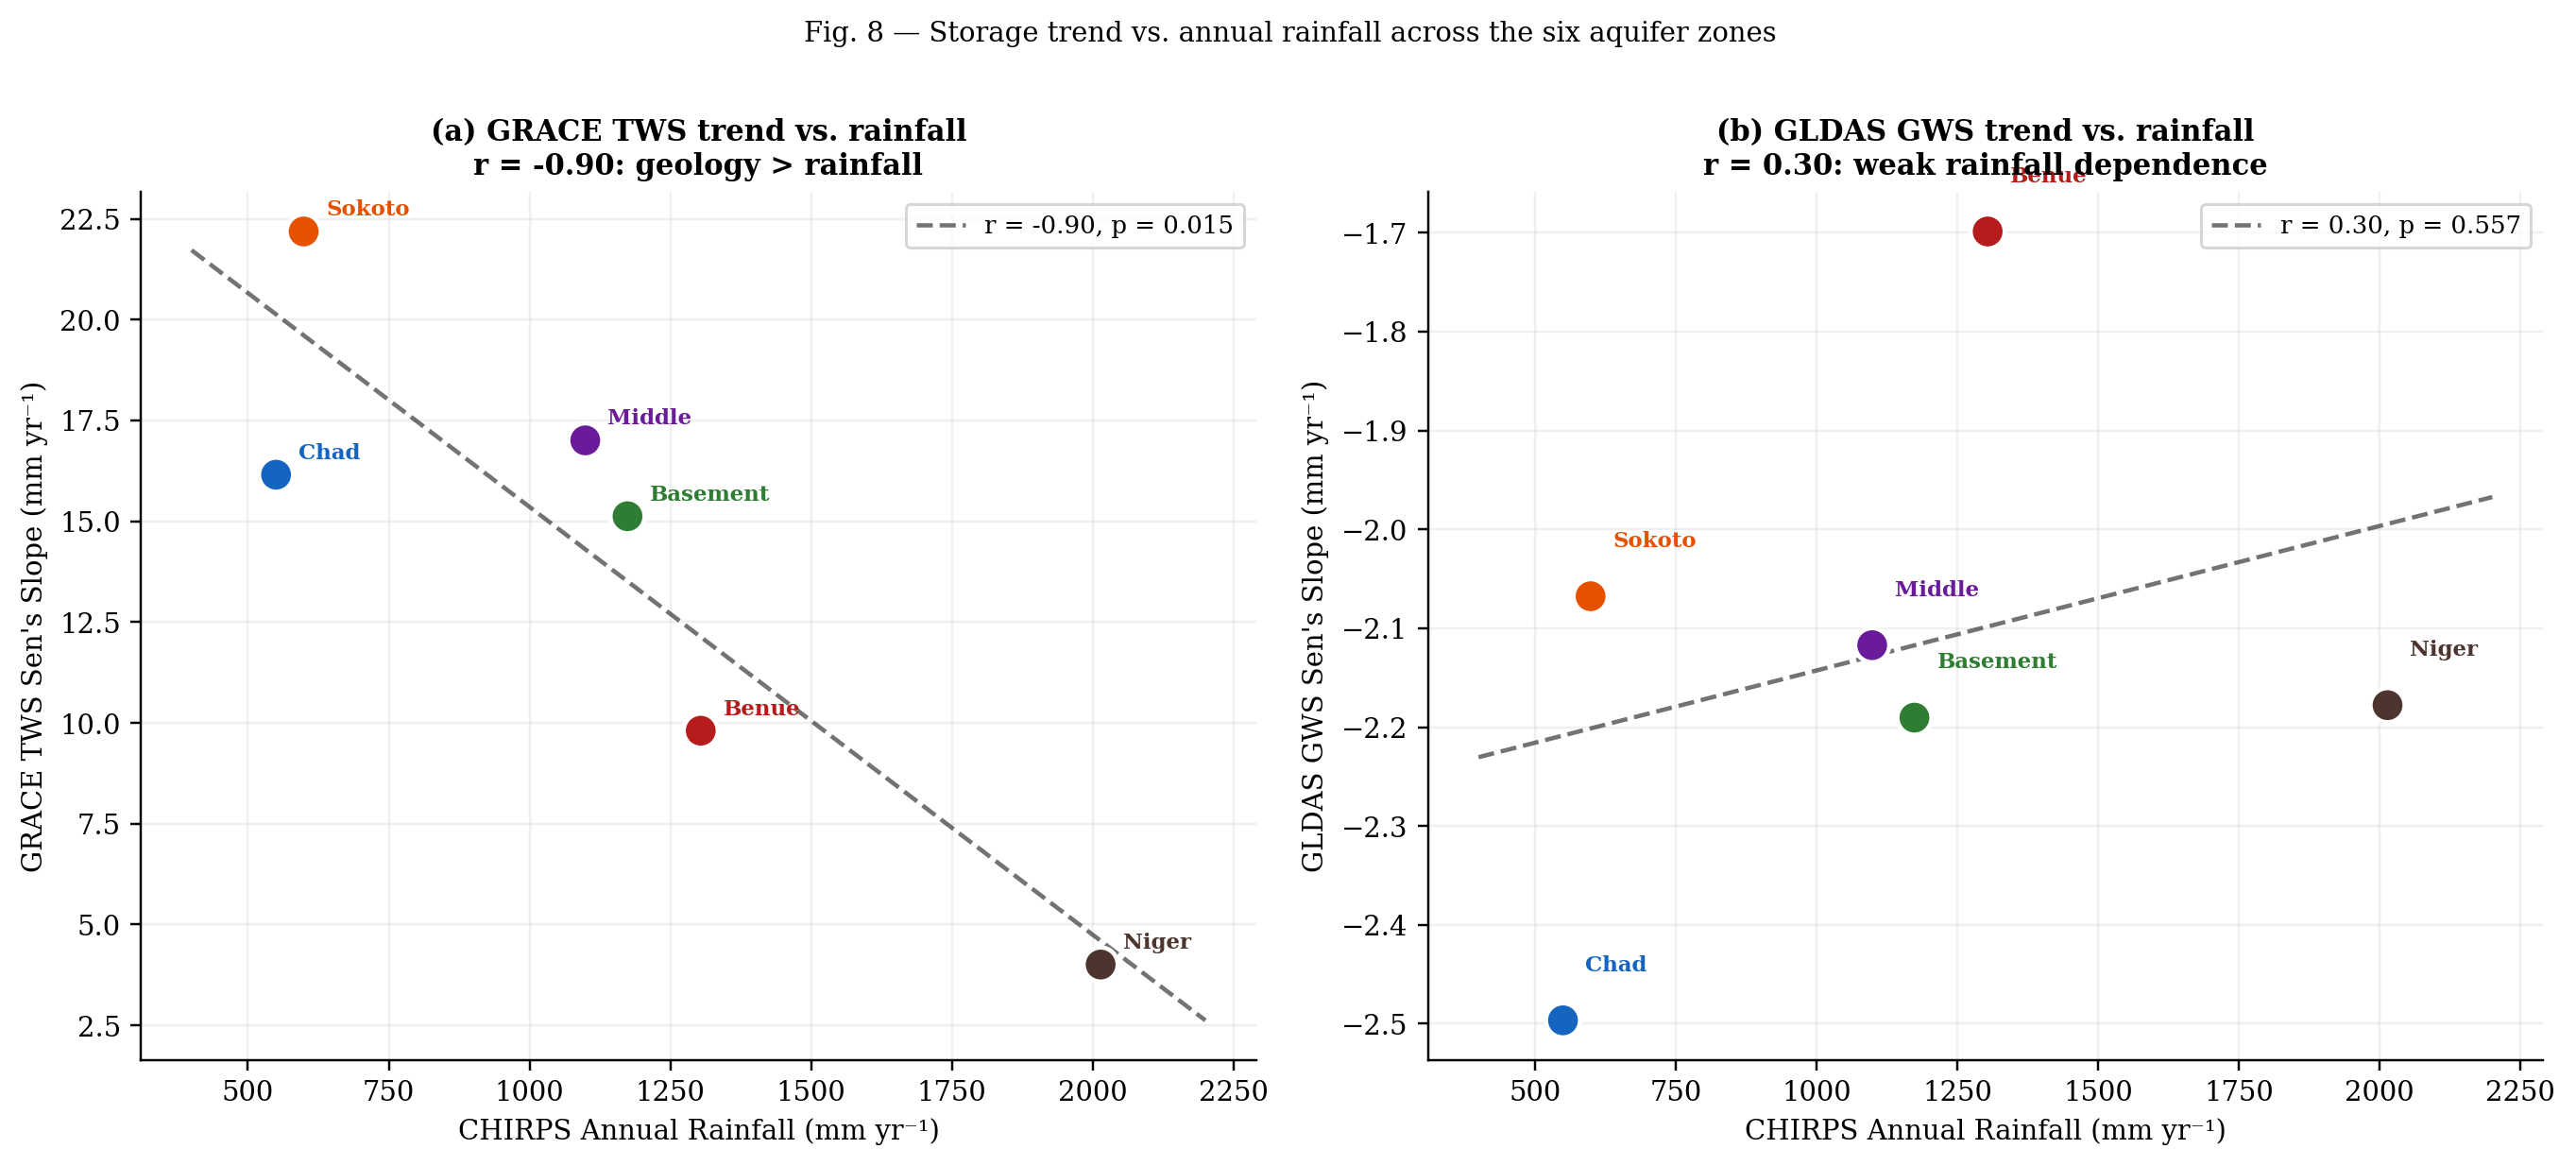


**Fig. S4** Storage trend versus CHIRPS annual rainfall across the six aquifer zones. (a) GRACE TWS Sen's slope: r = -0.71 (inverse correlation with rainfall). (b) GLDAS GWS Sen's slope: r = -0.04 (no rainfall dependence). The contrast confirms that GRACE TWS signal in northern semi-arid zones is dominated by soil moisture and surface water seasonality, while the groundwater compartment tracked by GLDAS is approximately stationary regardless of rainfall.

# **ESM Fig S5**


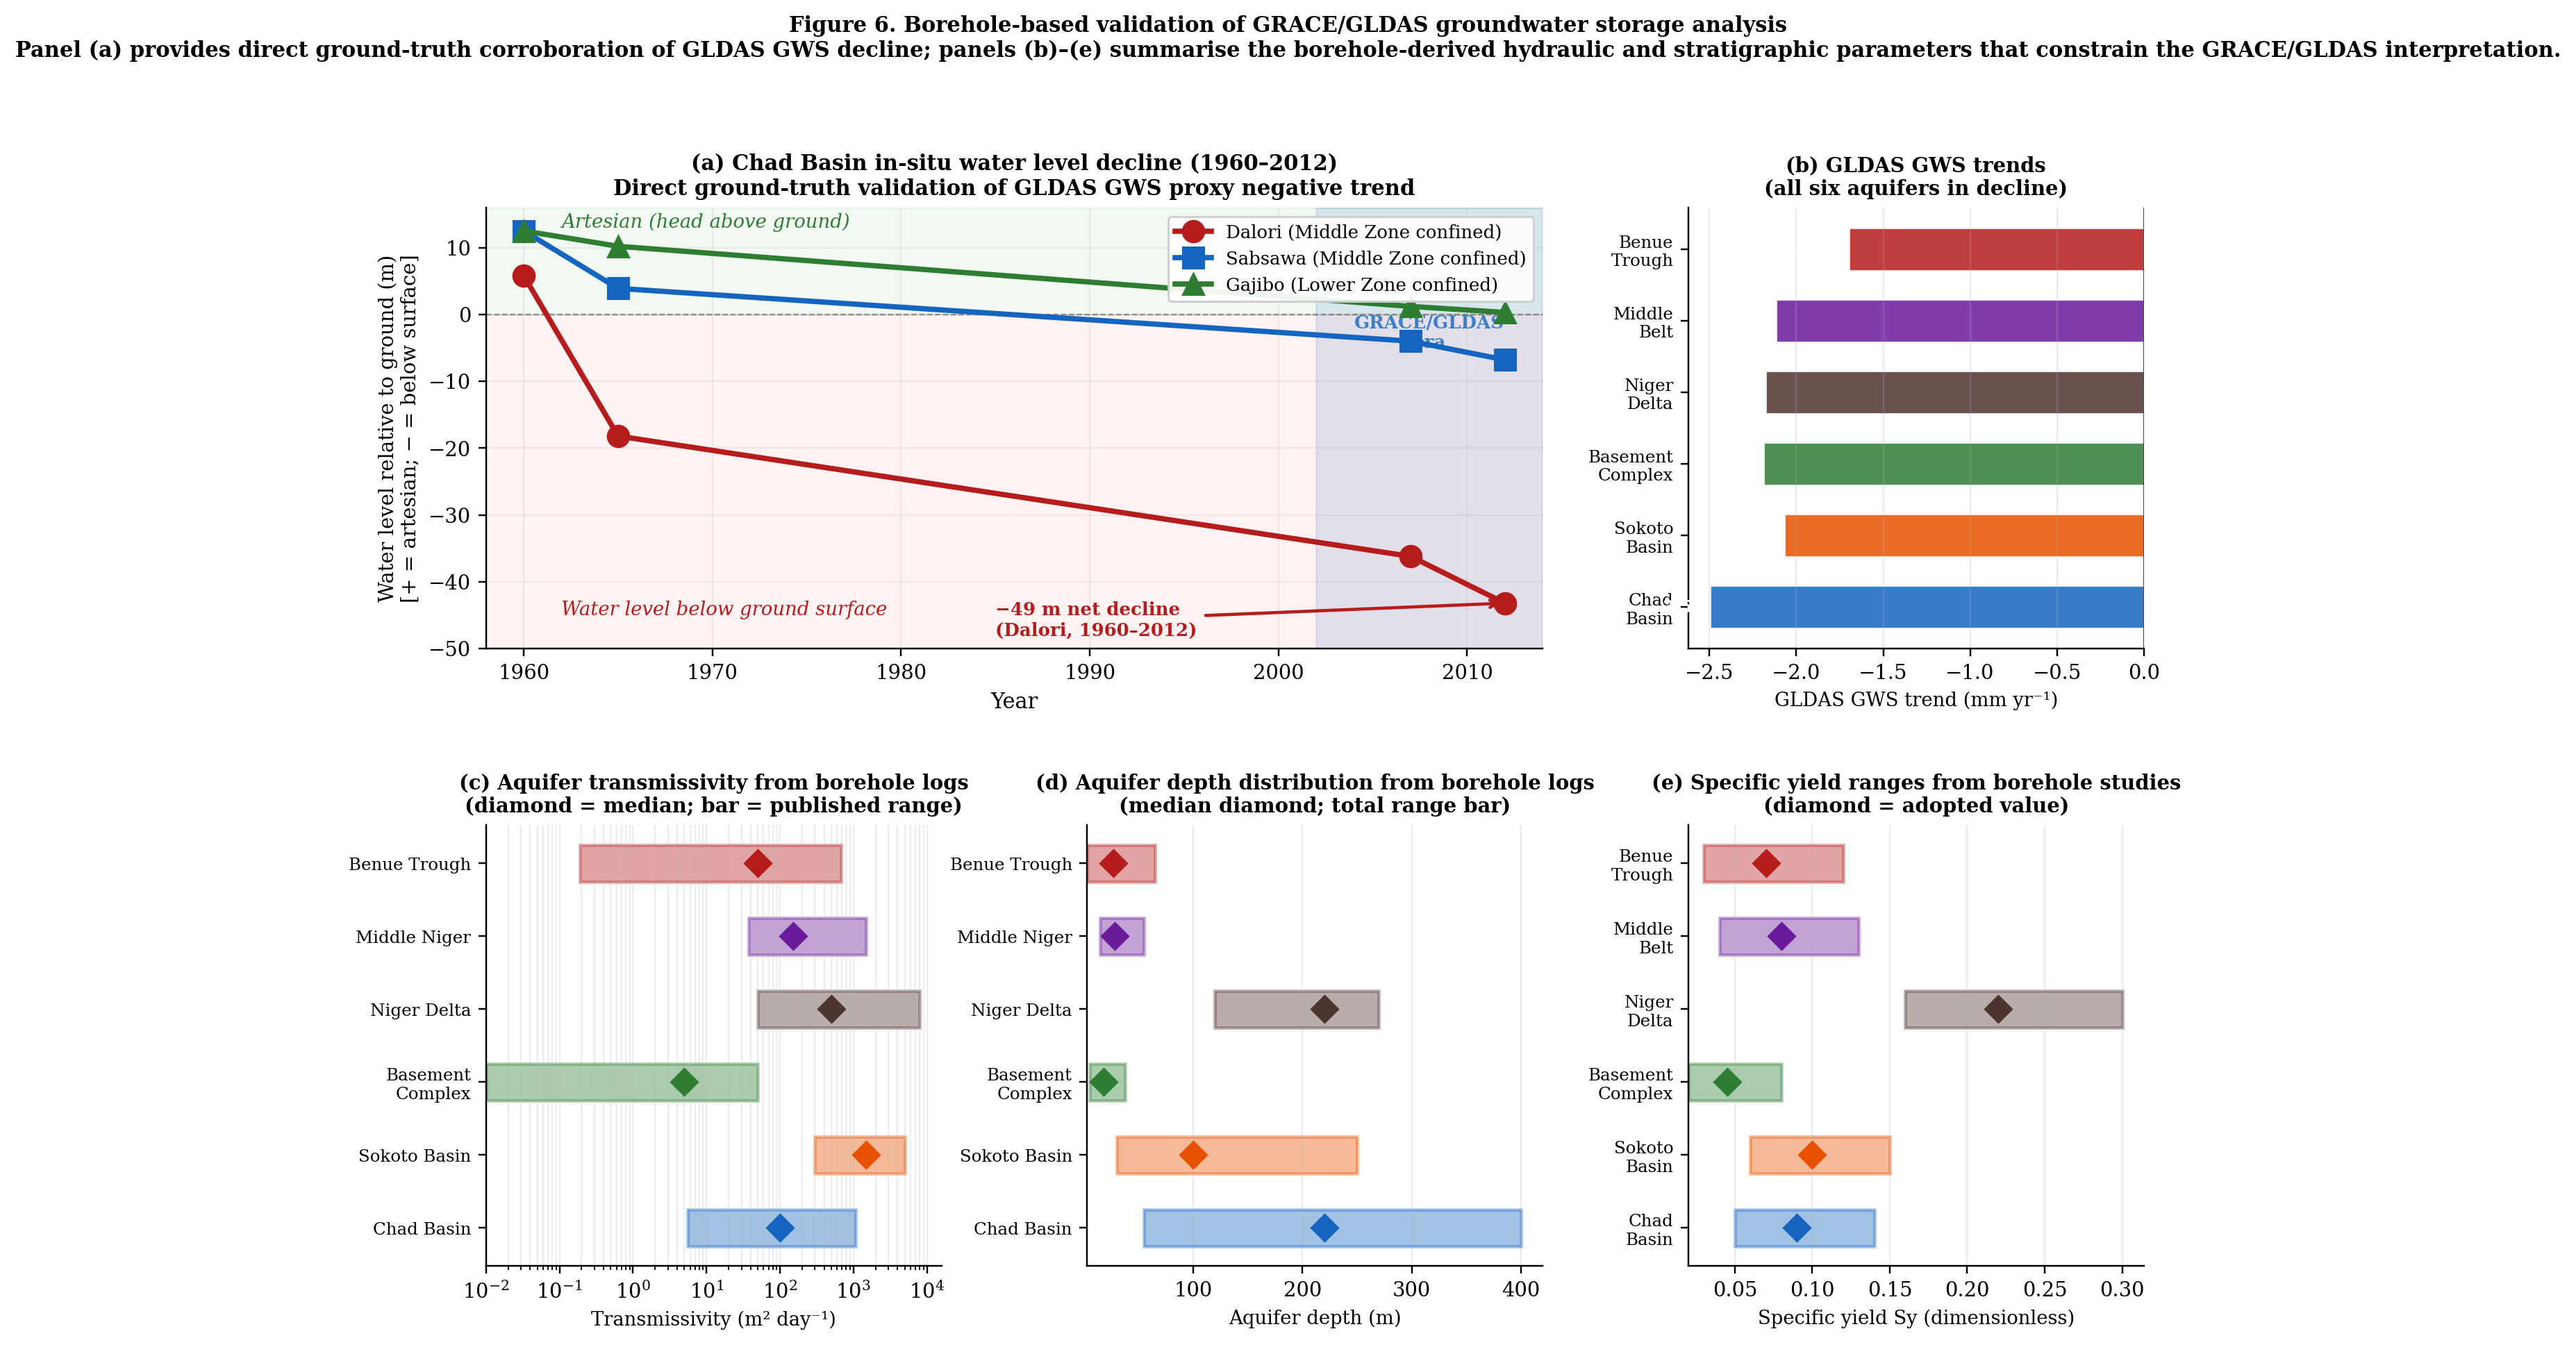


**Fig. S5** Borehole-based validation of satellite groundwater storage estimates. Top: Chad Basin Middle Zone water level decline 1960-2012 at Dalori, Sabsawa, and Gajibo (Adamu et al. 2017; Miller et al. 1968). Bottom: cross-zone hydraulic parameter compilation from 90+ archival borehole sites supporting the formation-specific Sy parameterisation propagated through Equation 5 of the main paper.
